# Supplementary material for: Association between Immune-Related Adverse Events and Survival in 319 Stage IV Melanoma Patients Treated with PD-1-Based Immunotherapy: An Approach Based on Clinical Chemistry
Source: MDPI journal article supplement (doi:10.3390/cancers13236141), 2021-12-06
Supplement: s1 [file s1]

# Association between Immune-Related Adverse Events and Survival in 319 Stage IV Melanoma Patients Treated with PD-1-Based Immunotherapy: An Approach Based on Clinical Chemistry

Lina María Serna-Higueta, Teresa Amaral, Andrea Forschner, Ulrike Leiter, Lukas Flatz, Olivia Seeber, Ioannis Thomas, Claus Garbe, Thomas Kurt Eigentler and Peter Martus

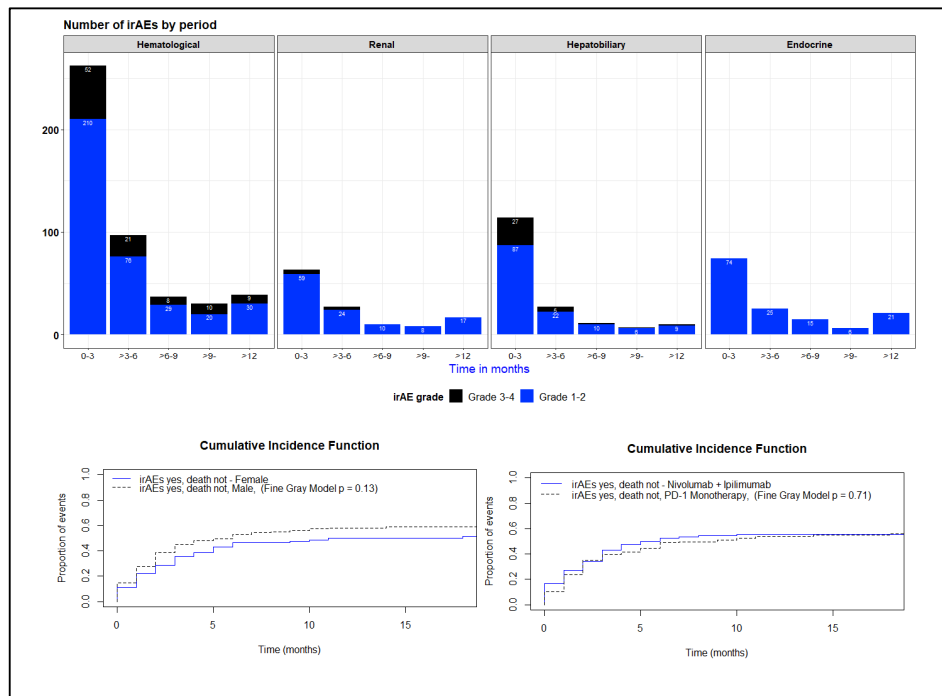

**Figure S1.** Number of immune-related adverse events by time-period and cumulative incidence of immune-related adverse events.  $n$  = number of patients at therapy by period. Cumulative incidences adjusted for competing risks. Note: 1 patient can have more than one side effect per period.

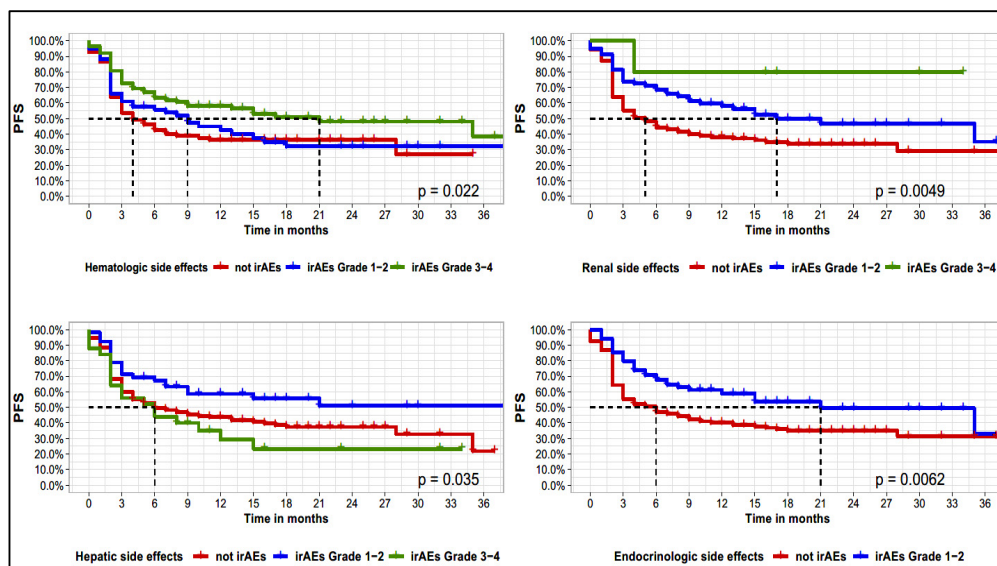

**Figure S2.** Kaplan–Meier curves for progression-free survival by type of immune-related adverse events, excluding patients who were lost to follow-up or died in the first 3 months after starting immunotherapy ( $n = 257$ ) (landmark survival analysis). irAEs: immune-related adverse events,  $p$ : Log-rank test  $p$ -value.

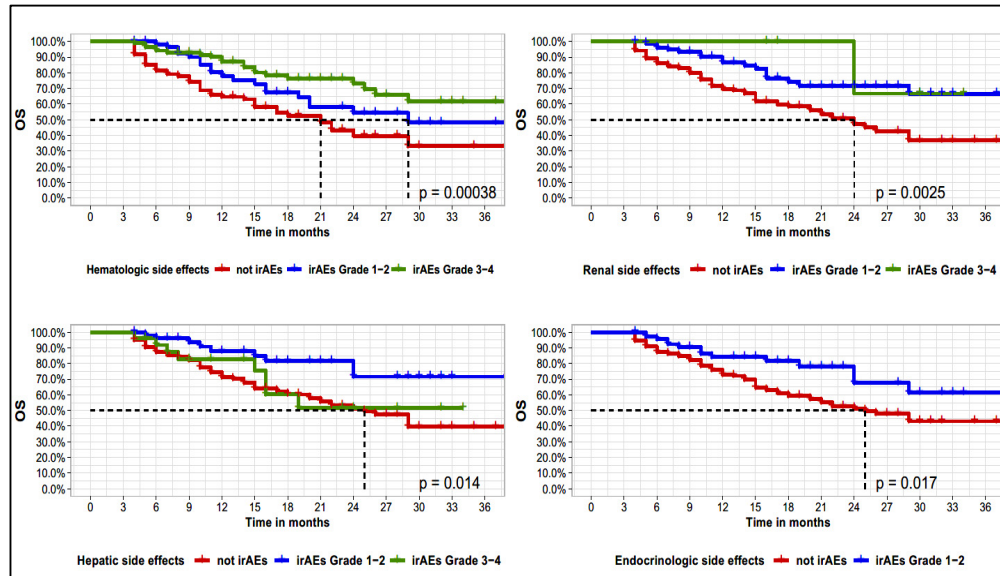

**Figure S3.** Kaplan–Meier curves for overall survival by type of immune-related adverse events, excluding patients who were lost to follow-up or died in the first 3 months after starting immunotherapy ( $n = 257$ ) (landmark survival analysis). irAEs: immune-related adverse events,  $p$ : Log-rank test  $p$ -value.
